# Supplementary material for: Implementation of an evidence-based model of care for low back pain in emergency departments: protocol for the Sydney Health Partners Emergency Department (SHaPED) trial
Source: PubMed Central journal article supplement — BMJ Open. 2018 Apr 19;8(4):e019052. doi: 10.1136/bmjopen-2017-019052 (PMC5914780; doi:10.1136/bmjopen-2017-019052), 2018-04-19
Supplement: bmjopen-2017-019052supp001.pdf [file bmjopen-2017-019052supp001.pdf]

## **Supplementary Appendix 1. The SHaPED trial investigators**

### *Writing Committee and Principal Investigators*

Gustavo Machado, Bethan Richards, Chris Needs, Rachelle Buchbinder, Ian Harris, Kirsten Howard, Kirsten McCaffery, Laurent Billot, James Edwards, Eileen Rogan, Rochelle Facer, David Lord Cowell, Chris Maher.

### *Participating sites and Local Investigators*

Royal Prince Alfred Hospital: Matthew Oliver, Danielle Coombs, Ruth Perrot.

Canterbury Hospital: Matthew Chu, Mona Marabani.

Concord Repatriation General Hospital: Daniel Harrison, Leslie Barnsley.

Dubbo Base Hospital: Kristy Hatswell.

### *Data Monitoring Committee*

Sydney Local Health District: Mauricio Oliveira, Noel Baidya, Hannah Storey, Rachael Knoblanche.

### *Collaborators*

Westmead Hospital: Matthew Vukasovic, Nicholas Manolios, Katherine Maka.

Royal North Shore Hospital: Rob Day, Rodger Laurent.

NSW Agency for Clinical Innovation: Matthew Jennings, Robyn Speerin.

Sydney Health Partners: Nobby Alcala.

Macquarie University: Niamh Moloney.

The University of Sydney: Manuela Ferreira, Paulo Ferreira, Chris Lin.
