# Supplementary material for: Implementation of an evidence-based model of care for low back pain in emergency departments: protocol for the Sydney Health Partners Emergency Department (SHaPED) trial
Source: PubMed Central journal article supplement — BMJ Open. 2018 Apr 19;8(4):e019052. doi: 10.1136/bmjopen-2017-019052 (PMC5914780; doi:10.1136/bmjopen-2017-019052), 2018-04-19
Supplement: bmjopen-2017-019052supp002.pdf [file bmjopen-2017-019052supp002.pdf]

**Supplementary Appendix 2. SNOMED CT-AU (EDRS) codes related to low back pain**

presentations

| <b>DESCRIPTION</b>                                                            | <b>CODES</b> |
|-------------------------------------------------------------------------------|--------------|
| <b>Low back pain with non-specific cause</b>                                  |              |
| Acute low back pain (finding)                                                 | 278862001    |
| Back pain complicating pregnancy (disorder)                                   | 91957002     |
| Backache (finding)                                                            | 161891005    |
| Blunt injury to back (disorder)                                               | 424270008    |
| Chronic back pain (finding)                                                   | 134407002    |
| Chronic low back pain (finding)                                               | 278860009    |
| Coccyx sprain (disorder)                                                      | 209571002    |
| Complaining of low back pain (finding)                                        | 161894002    |
| Degeneration of lumbar intervertebral disc (disorder)                         | 26538006     |
| Displacement of lumbar intervertebral disc without myelopathy (disorder)      | 20021007     |
| Exacerbation of backache (finding)                                            | 135860001    |
| Low back pain (finding)                                                       | 279039007    |
| Low back strain (disorder)                                                    | 300956001    |
| Lower back injury (disorder)                                                  | 282766005    |
| Lumbar spondylosis (disorder)                                                 | 239880009    |
| Lumbar sprain (disorder)                                                      | 209565008    |
| Mechanical low back pain (finding)                                            | 279040009    |
| Pain in the coccyx (finding)                                                  | 34789001     |
| Sacral back pain (finding)                                                    | 61486003     |
| Spasm of back muscles (finding)                                               | 203095000    |
| Sprain of ligament of lumbosacral joint (disorder)                            | 209548004    |
| Stiff back (finding)                                                          | 249921008    |
| Strain of back muscle (disorder)                                              | 262965006    |
| Strain of tendon of back (disorder)                                           | 262975009    |
| <b>Low back pain with neurological signs and symptoms</b>                     |              |
| Acute back pain with sciatica (finding)                                       | 247366003    |
| Acute sciatica (disorder)                                                     | 307176005    |
| Chronic sciatica (disorder)                                                   | 307177001    |
| Injury of lumbar nerve roots (disorder)                                       | 24300005     |
| Injury of sciatic nerve (disorder)                                            | 86269002     |
| Lumbago with sciatica (finding)                                               | 202794004    |
| Lumbago-sciatica due to displacement of lumbar intervertebral disc (disorder) | 46960006     |
| Lumbar disc prolapse with radiculopathy (disorder)                            | 202735001    |
| Lumbar radiculopathy (disorder)                                               | 128196005    |
| Sciatica (disorder)                                                           | 23056005     |
| Spinal stenosis of lumbar region (disorder)                                   | 18347007     |
| <b>Low back pain due to serious pathology</b>                                 |              |
| Abscess of back (disorder)                                                    | 309083007    |
| Abscess of back, except buttock (disorder)                                    | 19284003     |
| Cauda equina syndrome (disorder)                                              | 192970008    |
| Closed fracture lumbar vertebra (disorder)                                    | 207957008    |
| Collapse of lumbar vertebra (disorder)                                        | 308758008    |
| Compression fracture of lumbar spine (disorder)                               | 426646004    |
| Concussion and edema of lumbar spinal cord (disorder)                         | 212360005    |
| Contusion of back (disorder)                                                  | 11437003     |
| Contusion of lower back (disorder)                                            | 284062002    |
| Crush fracture of lumbar vertebra (disorder)                                  | 281933002    |
| Disc prolapse with myelopathy (disorder)                                      | 202728009    |

|                                                                          |           |
|--------------------------------------------------------------------------|-----------|
| Discitis (disorder)                                                      | 2304001   |
| Fracture of coccyx (disorder)                                            | 125871005 |
| Fracture of lumbar spine (disorder)                                      | 125608002 |
| Fracture of lumbar spine and/or pelvis (disorder)                        | 207986006 |
| Injury of cauda equina (disorder)                                        | 230614002 |
| Lumbar disc prolapse with myelopathy (disorder)                          | 202731005 |
| Multiple fractures of lumbar spine and/or pelvis (disorder)              | 207993005 |
| Open dislocation of coccyx (disorder)                                    | 44237008  |
| Open fracture of lumbar vertebra with spinal cord injury (disorder)      | 48956000  |
| Open fracture of sacrum AND/OR coccyx with spinal cord injury (disorder) | 65491009  |
| Traumatic dislocation of joint of lumbar vertebra (disorder)             | 129166009 |
| Traumatic dislocation of lumbosacral joint (disorder)                    | 129161004 |

SNOMED CT-AU (EDRS), Systematized Nomenclature of Medicine – Clinical Terms – Australian Version (Emergency Department Reference Set).
